# Supplementary material for: An Investigation on the Quantitative Structure-Activity Relationships of the Anti-Inflammatory Activity of Diterpenoid Alkaloids
Source: Molecules. 2017 Feb 27;22(3):363. doi: 10.3390/molecules22030363 (PMC6155234; doi:10.3390/molecules22030363)
Supplement: Supplementary file 1 [file molecules-22-00363-s001.pdf]

# Supplementary Materials: The Investigation on Quantitative Structure-Activity Relationship of the Anti-Inflammatory Activity for Diterpenoid Alkaloids

Xiao Li, Ning Li, Zhenyu Sui, Kaishun Bi and Zuoqing Li

Table S1. The weights for the descriptors and the responders for the three components in the loading plot of PLS-weight in the PLS model.

| Variable       | Component 1 | Component 2 | Component3 |
|----------------|-------------|-------------|------------|
| SAA            | 0.08536     | -0.3313     | -0.04633   |
| SAG            | 0.06451     | -0.2963     | 0.2549     |
| VOL            | 0.04399     | -0.29608    | 0.2690     |
| HE             | -0.2246     | 0.07921     | 0.1940     |
| LogP           | -0.05427    | -0.4194     | -0.8050    |
| REF            | -0.5720     | -0.6755     | -0.6162    |
| POL            | -0.5076     | -0.1768     | 0.1534     |
| MASS           | -0.4082     | 0.03622     | 0.2199     |
| BE             | 0.1623      | -0.3474     | 0.05742    |
| HF             | 0.3942      | -0.1200     | -0.1673    |
| $\log EC_{50}$ | 0.5034      | 0.2134      | 0.1530     |

Table S2. The predicted anti-inflammatory activities by PLS-QSAR model and the experiment anti-inflammatory activities and for 3 diterpenoid alkaloids.

| Compound Name | Predicted Value ( $EC_{50}$ ) | Experiment Value                |
|---------------|-------------------------------|---------------------------------|
| songorine     | $e^{3.8805}$                  | exhibiting inhibitory effect    |
| fuziling      | $e^{4.0517}$                  | exhibiting no inhibitory effect |
| delsoline     | $e^{0.3014}$                  | exhibiting no inhibitory effect |

Greater value of  $EC_{50}$  indicates lower activity of the compound. The values of  $EC_{50}$   $e^{3.8805}$  and  $e^{4.0517}$  do not indicate activities for fuziline and delsoline.
